# Supplementary material for: Nitrogen Removal Performance and Metabolic Pathways Analysis of a Novel Aerobic Denitrifying Halotolerant Pseudomonas balearica Strain RAD-17
Source: MDPI journal article supplement (doi:10.3390/microorganisms8010072), 2020-01-02
Supplement: s1 [file s1]

## Supplementary materials

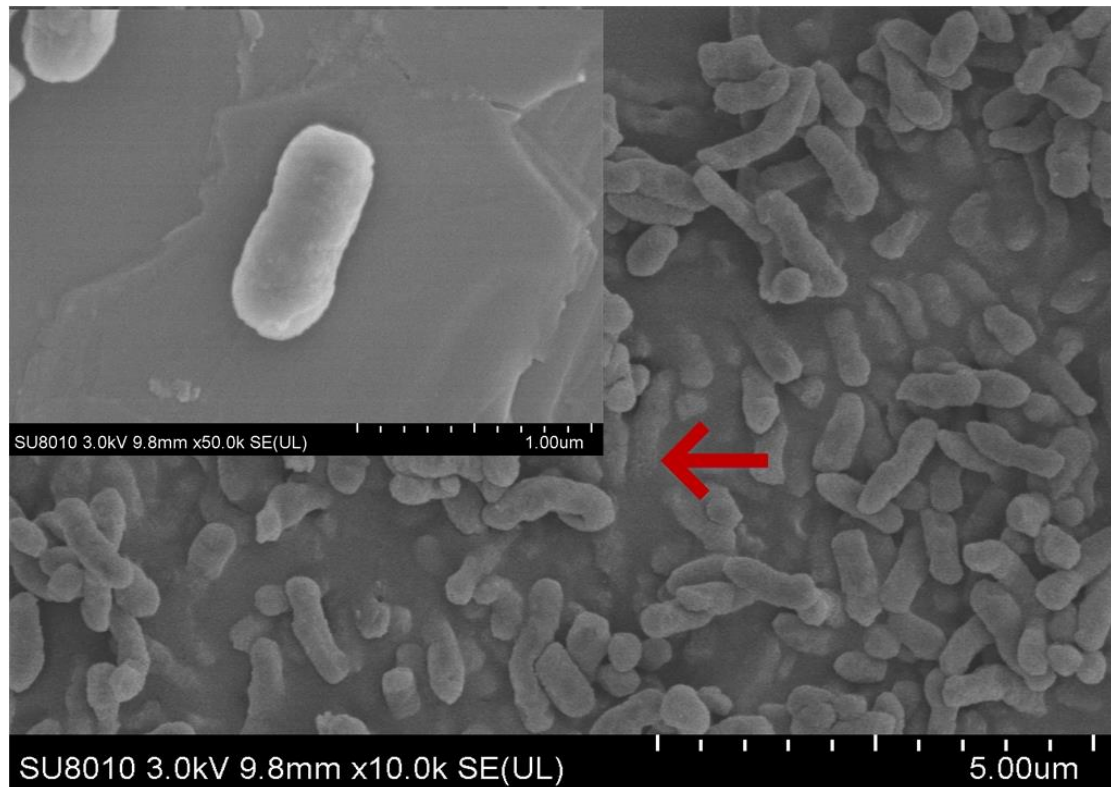

**Figure S1.** Scanning electron microscope micrograph of *Pseudomonas balearica* RAD-17.

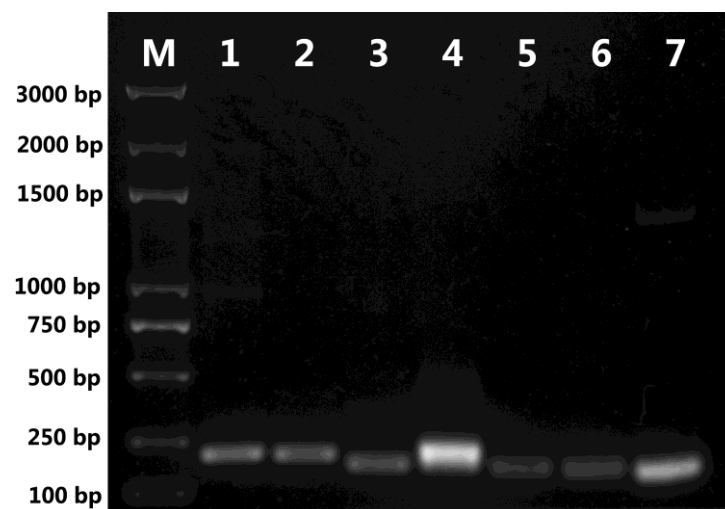

**Figure S2.** The specificity evaluation of PCR amplification assay. The specific DNA bands were detected by agarose gel electrophoresis, lane 1-7 represent the amplified products of 16S rDNA, *gluD*, *gluS*, *napA*, *nirS*, *norB* and *nosZ*, respectively.

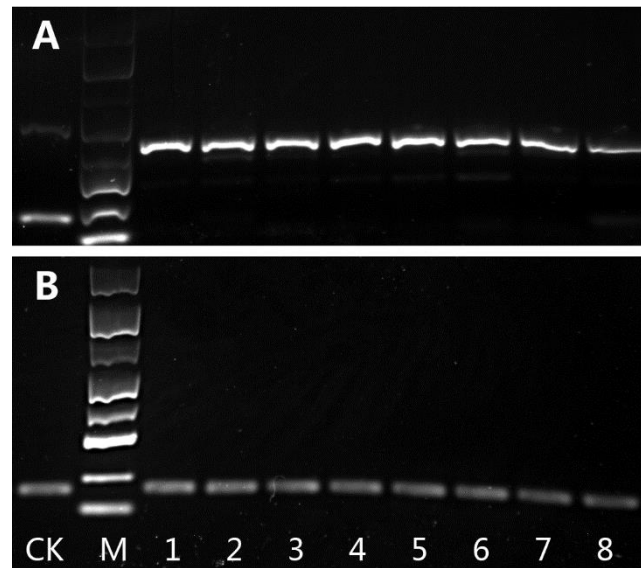

**Figure S3.** The agarose gel electrophoresis of the qRT-PCR amplification product of *napA* gene (A) and 16S rDNA genes (B) in one of the no-inoculum treatments. Lane 1-8 represent the time point of eight samples from 0 hour to 72 hours (including 0, 6, 12, 24, 30, 36, 48, 72 hours). M, marker; CK, positive control.
